# Supplementary material
Source: publisher figshare collection journal article supplement (https://karger.figshare.com/ndownloader/files/17946011)
Supplement: Supplementary file 1 [file 17946011]

| **Supplemental Table 1: Multivariable adjusted HR of mortality associated with LPA** | | | | | |
| --- | --- | --- | --- | --- | --- |
| **Cause of Death** | **LPA (MET-hours/week)** | | | | |
| **0-<3** | **3-<9** | **9-<15** | **15-<21** | **21+** |
| **All-cause** |  |  |  |  |  |
| No. deaths/Person-years | **4818 / 225916** | 18075 / 984278 | 6466 / 321429 | 7198 / 365370 | 10272 / 475859 |
| Model 1, HR (95% CI) | **1.16 (1.12-1.20)** | 1.00 (ref) | 1.02 (0.99-1.05) | 1.01 (0.98-1.03) | 1.00 (0.98-1.03) |
| Model 2, HR (95% CI) | **1.16 (1.12-1.20)** | 1.00 (ref) | 1.02 (0.99-1.05) | 1.01 (0.98-1.04) | 1.01 (0.98-1.03) |
| **Cancer** |  |  |  |  |  |
| No. deaths/Person-years | 1316 / 225916 | 5517 / 984278 | 1915 / 321429 | 2192 / 365370 | 3091 / 475859 |
| Model 1, HR (95% CI) | 1.04 (0.98-1.11) | 1.00 (ref) | 1.01 (0.96-1.06) | 1.03 (0.98-1.08) | 1.01 (0.97-1.06) |
| Model 2, HR (95% CI) | 1.04 (0.98-1.11) | 1.00 (ref) | 1.01 (0.96-1.06) | 1.03 (0.98-1.08) | 1.01 (0.96-1.06) |
| **CVD** |  |  |  |  |  |
| No. deaths/Person-years | 1679 / 225916 | 5800 / 984278 | 2174 / 321429 | 2325 / 365370 | 3481 / 475859 |
| Model 1, HR (95% CI) | **1.24 (1.17-1.31)** | 1.00 (ref) | 1.05 (1.00-1.11) | 1.01 (0.96-1.06) | **1.05 (1.01-1.10)** |
| Model 2, HR (95% CI) | **1.24 (1.17-1.31)** | 1.00 (ref) | **1.06 (1.01-1.11)** | 1.01 (0.97-1.06) | **1.06 (1.01-1.10)** |
| **Respiratory** |  |  |  |  |  |
| No. deaths/Person-years | 380 / 225916 | 1428 / 984278 | 516 / 321429 | 536 / 365370 | 820 / 475859 |
| Model 1, HR (95% CI) | **1.17 (1.05-1.31)** | 1.00 (ref) | 1.00 (0.90-1.10) | 0.91 (0.82-1.00) | 0.93 (0.85-1.01) |
| Model 2, HR (95% CI) | **1.17 (1.04-1.31)** | 1.00 (ref) | 1.00 (0.91-1.11) | 0.91 (0.83-1.01) | 0.94 (0.86-1.02) |
| **All other** |  |  |  |  |  |
| No. deaths/Person-years | 1443 / 225916 | 5330 / 984278 | 1861 / 321429 | 2145 / 365370 | 2880 / 475859 |
| Model 1, HR (95% CI) | **1.20 (1.13-1.27)** | 1.00 (ref) | 0.99 (0.94-1.05) | 1.01 (0.96-1.06) | 0.97 (0.93-1.01) |
| Model 2, HR (95% CI) | **1.19 (1.12-1.26)** | 1.00 (ref) | 1.00 (0.95-1.05) | 1.01 (0.96-1.07) | 0.97 (0.93-1.02) |

Values in bold are significant at *P*<.01. Model 1 adjusts for age, sex, race/ethnicity, smoking, alcohol use, aspirin use, education, employment status, marital status, ACS diet score, comorbidity score, and BMI. Model 2 additionally adjusts for MVPA. HR = hazards ratio; CI = confidence intervals; CVD = cardiovascular disease; LPA = light intensity physical activity; ACS = American Cancer Society; BMI = body mass index.
